# Supplementary material for: A broad-spectrum antibiotic adjuvant reverses multidrug-resistant Gram-negative pathogens
Source: Springer Nature journal article supplement (doi:10.1038/s41564-020-0723-z), 2020-05-18
Supplement: 41564_2020_723_MOESM1_ESM.pdf [file 41564_2020_723_MOESM1_ESM.pdf]

In the format provided by the authors and unedited.

# A broad-spectrum antibiotic adjuvant reverses multidrug-resistant Gram-negative pathogens

Meirong Song<sup>1,5</sup>, Yuan Liu<sup>1,4,5</sup>, Xiaoyong Huang<sup>1</sup>, Shuangyang Ding<sup>2,3</sup>, Yang Wang<sup>1</sup>,  
Jianzhong Shen<sup>1,2,3</sup> ✉ and Kui Zhu<sup>1,2</sup> ✉

<sup>1</sup>Beijing Advanced Innovation Center for Food Nutrition and Human Health, College of Veterinary Medicine, China Agricultural University, Beijing, China.

<sup>2</sup>National Center for Veterinary Drug Safety Evaluation, College of Veterinary Medicine, China Agricultural University, Beijing, China. <sup>3</sup>Beijing Key Laboratory of Detection Technology for Animal-Derived Food Safety and Beijing Laboratory for Food Quality and Safety, China Agricultural University, Beijing, China.

<sup>4</sup>Present address: Jiangsu Co-innovation Center for Prevention and Control of Important Animal Infectious Diseases and Zoonoses, Institute of Comparative Medicine, College of Veterinary Medicine, Yangzhou University, Yangzhou, Jiangsu, China. <sup>5</sup>These authors contributed equally: Meirong Song, Yuan Liu.

✉e-mail: [sjz@cau.edu.cn](mailto:sjz@cau.edu.cn); [zhuk@cau.edu.cn](mailto:zhuk@cau.edu.cn)

## Tables

**Supplementary Table 1 Strains of bacteria used in this study.**

| Strains                                               | Source/Reference |
|-------------------------------------------------------|------------------|
| <b>Gram-positive bacteria</b>                         |                  |
| <i>Bacillus subtilis</i>                              | ATCC 6051        |
| <i>Enterococcus faecalis</i> VRE A4                   | 1                |
| <i>Staphylococcus aureus</i>                          | ATCC 29213       |
| <i>S. aureus</i> 215 (LZD <sup>R</sup> + <i>cfr</i> ) | 1                |
| MRSA T144                                             | 1                |
| <b>Gram-negative bacteria</b>                         |                  |
| <i>Acinetobacter baumannii</i> 2-38 (MCR-1)           | In this study    |
| <i>Aeromonas veronii</i> 172 (MCR-3)                  | 2                |
| <i>Citrobacter freundii</i> 2-4 (MCR-1)               | In this study    |
| <i>Escherichia coli</i>                               | ATCC 25922       |
| <i>E. coli</i> C3 (NDM-1)                             | In this study    |
| <i>E. coli</i> G6 (NDM-5)                             | In this study    |
| # <i>E. coli</i> B2 (NDM-5 + MCR-1)                   | In this study    |
| <i>E. coli</i> 3CZ20E (MCR-1 + FLO <sup>R</sup> )     | In this study    |
| <i>E. coli</i> I1 (NDM-5 + MCR-1)                     | In this study    |
| <i>E. coli</i> L14 (ESBL + MCR-1)                     | In this study    |
| <i>E. coli</i> F9 (ESBL + MCR-1)                      | In this study    |
| <i>E. coli</i> 267 (MCR-1)                            | In this study    |
| <i>E. coli</i> 1347 (MCR-1)                           | In this study    |
| <i>E. coli</i> DH5 $\alpha$ (pUC19)                   | 3                |
| <i>E. coli</i> DH5 $\alpha$ (pUC19- <i>mcr-1</i> )    | 3                |
| <i>Enterobacter cloacae</i> 16-15 (MCR-1)             | In this study    |
| <i>Klebsiella pneumoniae</i> 16-80(MCR-1)             | In this study    |
| <i>K. pneumoniae</i> WNX2                             | In this study    |
| <i>K. pneumoniae</i> 4-20 (MCR-1)                     | In this study    |
| <i>K. pneumoniae</i> 16-87 (MCR-1)                    | In this study    |
| <i>K. pneumoniae</i> 16-63 (MCR-1)                    | In this study    |
| <i>Pseudomonas aeruginosa</i> PAO1                    | ATCC 47085       |
| <i>Raoultella ornithinolytica</i> 16-68 (MCR-1)       | In this study    |
| <i>Raoultella planticola</i> 16-15 (MCR-1)            | In this study    |
| <i>Serratia marcescens</i> 16-99 (MCR-1)              | In this study    |
| <i>Salmonella enterica</i>                            | ATCC 13076       |
| <i>S. enteritidis</i> SH30 (MCR-1)                    | In this study    |

ATCC, American Type Culture Collection; VRE, vancomycin-resistant *Enterococcus*; *cfr*, florfenicol/chloramphenicol resistance gene; MRSA, methicillin-resistant *Staphylococcus aureus*; LZD<sup>R</sup>, linezolid resistance. FLO<sup>R</sup>, fluoroquinolone resistance. MCR, mobile colistin resistance.

**Supplementary Table 2 All antimicrobial resistance genes in *E. coli* B2.**

|                         | Gene                          | Phenotype                                                                                                                                       |
|-------------------------|-------------------------------|-------------------------------------------------------------------------------------------------------------------------------------------------|
| Chromosome<br>(4667 kb) | <i>mdfA</i>                   | Cationic or zwitterionic lipophilic compounds such as ethidium bromide, tetraphenylphosphonium, rhodamine, rifampin, tetracycline and puromycin |
| Plasmid 1<br>(224 kb)   | <i>tetA</i>                   | Tetracyclines                                                                                                                                   |
|                         | <i>mcr-1</i>                  | Colistin                                                                                                                                        |
|                         | <i>sul2</i>                   | Sulfonamides                                                                                                                                    |
|                         | <i>flo<sup>R</sup></i>        | Florfenicol                                                                                                                                     |
|                         | <i>bla<sub>CTX-M-14</sub></i> | β-lactams, especially cefotaxim                                                                                                                 |
|                         | <i>fosA3</i>                  | Fosfomycin                                                                                                                                      |
|                         | <i>ahp(4)-Ia</i>              | Hygromycin B                                                                                                                                    |
|                         | <i>aac(3)-IV</i>              | Aminoglycosides                                                                                                                                 |
| Plasmid 2<br>(133 kb)   | <i>aac(6')-Ib3</i>            | Aminoglycosides                                                                                                                                 |
|                         | <i>dfrA14</i>                 | Trimethoprim                                                                                                                                    |
|                         | <i>dfrA17</i>                 | Trimethoprim                                                                                                                                    |
|                         | <i>sul2</i>                   | Sulfonamides                                                                                                                                    |
|                         | <i>flo<sup>R</sup></i>        | Florfenicol                                                                                                                                     |
|                         | <i>oqxA</i>                   | Quinolones                                                                                                                                      |
|                         | <i>oqxB</i>                   | Quinolones                                                                                                                                      |
|                         | <i>bla<sub>OXA-10</sub></i>   | Carbapenems                                                                                                                                     |
|                         | <i>aadA1</i>                  | Aminoglycosides                                                                                                                                 |
|                         | <i>aadA5</i>                  | Aminoglycosides                                                                                                                                 |
|                         | <i>arr-2</i>                  | Rifampin                                                                                                                                        |
| Plasmid 3<br>(44 kb)    | <i>cmlA1</i>                  | Chloramphenicol                                                                                                                                 |
|                         | <i>bla<sub>NDM-5</sub></i>    | Carbapenems                                                                                                                                     |
| Plasmid 4<br>(20 kb)    | <i>bla<sub>TEM-1B</sub></i>   | Penicillins                                                                                                                                     |
|                         | <i>tetA</i>                   | Tetracyclines                                                                                                                                   |
|                         | <i>tetA*</i>                  | Tetracyclines                                                                                                                                   |
| Plasmid 5<br>(7 kb)     | /                             | /                                                                                                                                               |

\* another copy of *tetA* in plasmid 4

**Supplementary Table 3 Antibacterial activities of SLAP-S25 against different bacteria.**

| Strains                                               | SLAP-S25 ( $\mu\text{g/mL}$ ) |
|-------------------------------------------------------|-------------------------------|
| <i>Bacillus subtilis</i> 6051                         | 8                             |
| <i>Staphylococcus aureus</i> ATCC 29213               | 64                            |
| <i>S. aureus</i> 215 (LZD <sup>R</sup> + <i>cfr</i> ) | 8                             |
| MRSA T144                                             | 64                            |
| <i>Enterococcus faecalis</i> VRE A4                   | 8                             |
| <i>Escherichia coli</i> ATCC 25922                    | 12                            |
| <i>E. coli</i> C3 (NDM-1)                             | 12                            |
| <i>E. coli</i> G6 (NDM-5)                             | 12                            |
| <i>E. coli</i> B2 (NDM-5 + MCR-1)                     | 12                            |
| <i>E. coli</i> 3CZ20E (MCR-1 + FLO <sup>R</sup> )     | 12                            |
| <i>E. coli</i> I1 (NDM-5 + MCR-1)                     | 12                            |
| <i>E. coli</i> L14 (ESBL + MCR-1)                     | 12                            |
| <i>E. coli</i> F9 (ESBL + MCR-1)                      | 12                            |
| <i>E. coli</i> 267 (MCR-1)                            | 12                            |
| <i>E. coli</i> 1347 (MCR-1)                           | 12                            |
| <i>Salmonella enterica</i> ATCC 13076                 | 1                             |
| <i>Pseudomonas aeruginosa</i> PAO1                    | 4                             |
| <i>Klebsiella pneumoniae</i> WNX2                     | 16                            |

**Supplementary Table 4 Potency of SLAP-S25 combined with antibiotics against antibiotic-sensitive *E. coli*.**

| Antibiotics         | MIC without S25 ( $\mu\text{g/mL}$ ) | FIC index | MIC with S25 <sup>a</sup> ( $\mu\text{g/mL}$ ) | Potentialiation (fold) <sup>b</sup> |
|---------------------|--------------------------------------|-----------|------------------------------------------------|-------------------------------------|
| <i>E. coli</i> 267  |                                      |           |                                                |                                     |
| Cefepime            | 0.0625                               | 0.25      | 0.0313                                         | 2                                   |
| Colistin            | 4                                    | 0.375     | 0.5                                            | 8                                   |
| Ofloxacin           | 0.5                                  | 0.094     | 0.0625                                         | 8                                   |
| Rifampicin          | 8                                    | 0.093     | $\leq 0.0625$                                  | $\geq 128$                          |
| Tetracycline        | 0.5                                  | 0.125     | 0.0625                                         | 8                                   |
| Vancomycin          | 128                                  | 0.375     | 32                                             | 4                                   |
| <i>E. coli</i> 1347 |                                      |           |                                                |                                     |
| Cefepime            | 0.0625                               | 0.078     | 0.0156                                         | 4                                   |
| Colistin            | 4                                    | 0.25      | 0.5                                            | 8                                   |
| Ofloxacin           | 0.5                                  | 0.188     | 0.0625                                         | 8                                   |
| Rifampicin          | 8                                    | 0.038     | $\leq 0.0625$                                  | $\geq 128$                          |
| Tetracycline        | 0.5                                  | 0.25      | 0.125                                          | 4                                   |
| Vancomycin          | 128                                  | 0.25      | 8                                              | 16                                  |

MIC of different antibiotics (<sup>a</sup>) and degree of antibiotic potentialiation (<sup>b</sup>) in the presence of 4  $\mu\text{g/mL}$  SLAP-S25.

**Supplementary Table 5 Synergistic activity of pentamidine (PTM) with rifampicin or colistin against *E. coli* B2.**

| Antibiotics | MIC without PTM ( $\mu\text{g/mL}$ ) | FIC index | MIC with PTM <sup>a</sup> ( $\mu\text{g/mL}$ ) | Potentialiation (fold) <sup>b</sup> |
|-------------|--------------------------------------|-----------|------------------------------------------------|-------------------------------------|
| Rifampicin  | 128                                  | 0.156     | 4                                              | 32                                  |
| Colistin    | 8                                    | 2         | 8                                              | None                                |

MIC of different antibiotics (<sup>a</sup>) and degree of antibiotic potentialiation (<sup>b</sup>) in the presence of 100  $\mu\text{g/mL}$  pentamidine.

**Supplementary Table 6 FIC indices of colistin and SLAP-S25 against different bacterial species (MIC, µg/mL) harboring colistin resistant gene *mcr*.**

| Strains                                 | Colistin |       | SLAP-S25 |       | FIC index |
|-----------------------------------------|----------|-------|----------|-------|-----------|
|                                         | MIC      | FICc  | MIC      | FICs  |           |
| <i>Acinetobacter baumannii</i> 2-38     | 8        | 0.008 | 4        | 0.016 | 0.024     |
| <i>Aeromonas veronii</i> 172            | 2        | 0.125 | 4        | 0.250 | 0.375     |
| <i>Citrobacter freundii</i> 2-4         | 8        | 0.031 | 2        | 0.063 | 0.094     |
| <i>Escherichia coli</i> B2              | 8        | 0.031 | 12       | 0.016 | 0.047     |
| <i>Enterobacter cloacae</i> 16-15       | 8        | 0.125 | 4        | 0.125 | 0.250     |
| <i>Klebsiella pneumoniae</i> 16-80      | 16       | 1.000 | 2        | 0.500 | 1.500     |
| <i>Providencia alcalifaciens</i> 16-1   | 16       | 0.001 | 16       | 0.001 | 0.002     |
| <i>Raoultella ornithinolytica</i> 16-68 | 4        | 0.063 | 4        | 0.008 | 0.071     |
| <i>Raoultella planticola</i> 16-15      | 16       | 0.031 | 8        | 0.015 | 0.046     |
| <i>Serratia marcescens</i> 16-99        | 8        | 0.008 | 8        | 0.063 | 0.071     |
| <i>Salmonella enteritidis</i> SH30      | 16       | 0.016 | 4        | 0.063 | 0.079     |

Fractional inhibitory concentration (FIC) indices were calculated based on checkerboard broth microdilution assays. FIC index is the sum of FICc and FICs. FICc is the FIC of colistin. FICs is the FIC of SLAP-S25. All strains carry plasmid mediated *mcr-1* genes, except *Aeromonas veronii* 172, which has *mcr-3* in chromosome.

**Supplementary Table 7 SLAP-S25 potentiates the antibacterial activity of rifampicin, ofloxacin and tetracycline against *Klebsiella pneumoniae*.**

| Strains                                     | FIC index |            |              |
|---------------------------------------------|-----------|------------|--------------|
|                                             | Ofloxacin | Rifampicin | Tetracycline |
| <i>K. pneumoniae</i> WNX2                   | 0.012     | 0.017      | 0.034        |
| <i>K. pneumoniae</i> 16-63 ( <i>mcr-1</i> ) | 0.0059    | 0.064      | 0.129        |
| <i>K. pneumoniae</i> 4-20 ( <i>mcr</i> )    | 0.127     | 0.033      | 0.065        |
| <i>K. pneumoniae</i> 91 ( <i>mcr</i> )      | 0.010     | 0.006      | 0.017        |

Different *K. pneumoniae* strains were treated with SLAP-S25 in the presence of ofloxacin, or rifampicin or tetracycline. *K. pneumoniae* WNX2 is sensitive to colistin (MIC  $\leq 2$   $\mu\text{g/mL}$ ), while the other strains are resistant to colistin (MIC  $\geq 8$   $\mu\text{g/mL}$ ).



**Supplementary Table 8 Effects of additional LPS, Mg<sup>2+</sup>, PG and NAC on the antibacterial activity of antibiotics and SLAP-S25 against *E. coli*.**

| Antibiotics  | MIC (µg/mL) |       |      |                    |      |
|--------------|-------------|-------|------|--------------------|------|
|              | MHB         | + LPS | + PG | + Mg <sup>2+</sup> | +NAC |
| SLAP-S25     | 16          | 64    | 32   | 64                 | 32   |
| Cefepime     | 0.03        | 0.03  | 0.03 | 0.03               | /    |
| Colistin     | 0.25        | 2     | 16   | 8                  | /    |
| Ofloxacin    | 0.03        | 0.03  | 0.03 | 0.5                | /    |
| Rifampicin   | 8           | 8     | 8    | 8                  | /    |
| Tetracycline | 2           | 2     | 4    | 32                 | /    |
| Vancomycin   | 2           | 2     | 2    | 2                  | /    |

The final concentrations of additional LPS, PG, Mg<sup>2+</sup> and NAC in MHB broth were 128 µg/mL, 16 µg/mL, 480 µg/mL and 6 mmol/L, respectively. *E. coli* ATCC 25922 was tested for antibacterial activities.

**Supplementary Table 9 Exogenous LPS abolished the synergy between SLAP-S25 and non-LPS targeting antibiotics.**

| Antibiotics | MIC <sup>a</sup><br>( $\mu\text{g/mL}$ ) | FIC index <sup>a</sup> | MIC <sup>b</sup><br>( $\mu\text{g/mL}$ ) | FIC index <sup>b</sup> |
|-------------|------------------------------------------|------------------------|------------------------------------------|------------------------|
| Cefepime    | 1                                        | 0.156                  | 32                                       | >0.5                   |
| Vancomycin  | 8                                        | 0.094                  | 128                                      | >0.5                   |

MICs of antibiotics or FIC index in the absence (<sup>a</sup>) and presence (<sup>b</sup>) of LPS with 4  $\mu\text{g/mL}$  SLAP-S25. The LPS of *E. coli* O111:B4 was purchased from Sigma, and 128  $\mu\text{g/mL}$  LPS was added.

**Supplementary Table 10 Exogenous Mg<sup>2+</sup> counteracted the synergistic activity between SLAP-25 and non-LPS targeting antibiotics.**

| Antibiotics | MIC <sup>a</sup><br>(µg/mL) | FIC index <sup>a</sup> | MIC <sup>b</sup><br>(µg/mL) | FIC index <sup>b</sup> |
|-------------|-----------------------------|------------------------|-----------------------------|------------------------|
| Cefepime    | 1                           | 0.156                  | 32                          | >0.5                   |
| Vancomycin  | 8                           | 0.094                  | 128                         | >0.5                   |

MICs of antibiotics or FIC index in the absence (<sup>a</sup>) and presence (<sup>b</sup>) of Mg<sup>2+</sup> (480 µg/mL) with 4 µg/mL SLAP-S25.

**Supplementary Table 11 MRM parameters for the determination of antibiotics by LC-MS/MS.**

| Compound     | Precursor ion<br>( <i>m/z</i> ) | Product ions<br>( <i>m/z</i> ) | Q1 pre bias<br>(V) | Collision energy<br>(eV) | Q3 pre bias<br>(V) |
|--------------|---------------------------------|--------------------------------|--------------------|--------------------------|--------------------|
| Cefepime     | 481.05                          | 396.00*                        | -18                | -14                      | -28                |
|              |                                 | 166.90                         | -14                | -24                      | -18                |
| Tetracycline | 445.25                          | 410.15*                        | -22                | -20                      | -22                |
|              |                                 | 428.10                         | -22                | -20                      | -23                |
| Vancomycin   | 725.40                          | 100.10*                        | -26                | -44                      | -21                |
|              |                                 | 144.20                         | -26                | -16                      | -29                |
| Ofloxacin    | 362.20                          | 318.20*                        | -25                | -18                      | -24                |
|              |                                 | 261.10                         | -26                | -29                      | -28                |
| Rifampicin   | 823.40                          | 151.20*                        | -24                | -19                      | -30                |
|              |                                 | 791.45                         | -24                | -36                      | -30                |
| Colistin     | 585.35                          | 227.20*                        | -28                | -35                      | -26                |
|              |                                 | 228.25                         | -28                | -36                      | -28                |

\*, quantitative ion.

## Figures

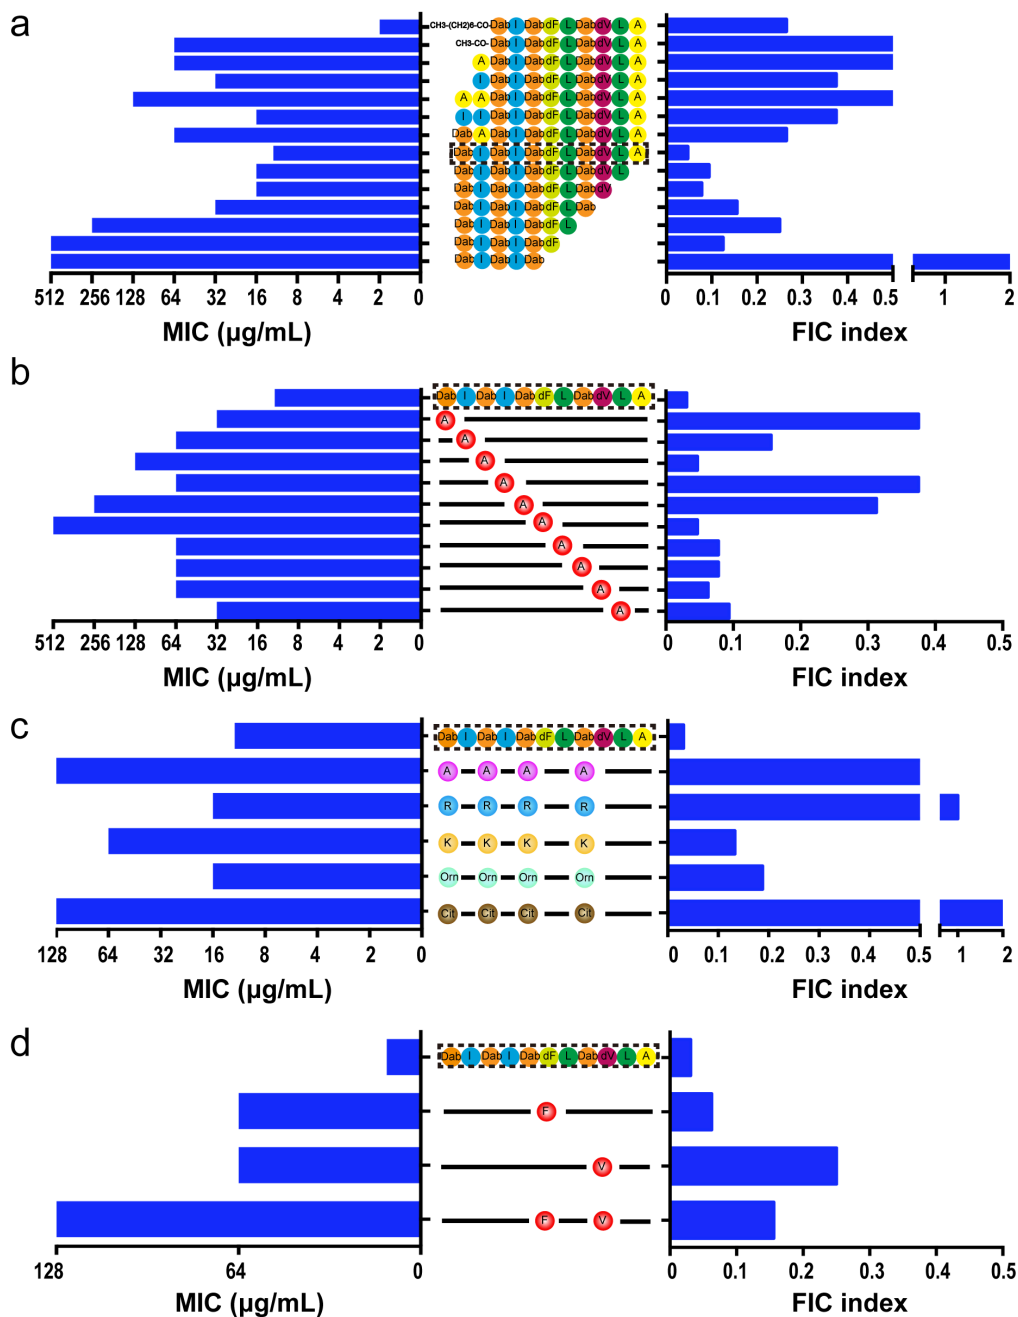

### Supplementary Figure 1 Rationally engineered and structure-activity relationship of SLAP-S25.

Antibacterial activity (MIC, µg/mL) and synergistic activity with colistin (FIC index) of SLAP-S25 and its substitutions were determined, including modification or deletion from *N*- or *C*-terminal (**a**), alanine screening library (**b**); Replacement of Dab in SLAP-S25 with Ala (A), Arg (R), Lys (K), Orn and Cit (**c**); Conformation changes of *D*-Phe and/or *D*-Val (**d**); Synergy is defined as an FIC index of  $\leq 0.5$ . Data were representative of two biological replicates ( $n = 2$ ).

**a**

| Treatments                                 | Colistin |       | SLAP-S25 |       | FIC index |
|--------------------------------------------|----------|-------|----------|-------|-----------|
|                                            | MIC      | FICc  | MIC      | FICs  |           |
| <i>E. coli</i> B2                          | 8        | 0.031 | 12       | 0.016 | 0.047     |
| <i>E. coli</i> B2 + 50% fetal bovine serum | 16       | 0.125 | 16       | 0.031 | 0.156     |
| <i>E. coli</i> B2 + 50% rabbit serum       | 8        | 0.031 | 12       | 0.031 | 0.062     |

**b**

| Proteases<br>(20 mg/mL) | Activity sites | SLAP-S25<br>( $\mu\text{g/mL}$ ) |
|-------------------------|----------------|----------------------------------|
| PBS                     | —              | 12                               |
| Trypsin                 | Arg, Lys       | 12                               |
| Pepsin                  | Tyr, Phe, Trp  | 12                               |
| Papain                  | Arg, Lys, Gly  | 16                               |

**c**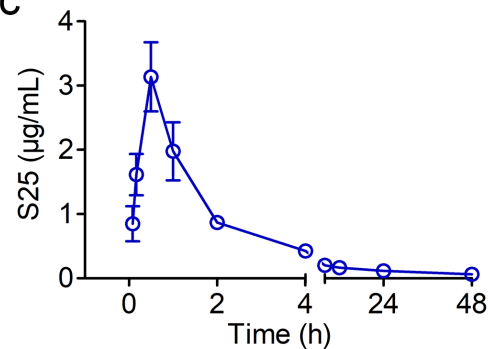**d**

| Parameters                            | Mean $\pm$ SD    |
|---------------------------------------|------------------|
| $C_{\text{max}}$ ( $\mu\text{g/mL}$ ) | $3.14 \pm 1.32$  |
| $T_{\text{max}}$ (hours)              | 0.5              |
| $t_{1/2}$ (hours)                     | $1.55 \pm 0.26$  |
| AUC ( $\mu\text{g-hour/mL}$ )         | $10.71 \pm 3.20$ |
| CL (L/hour/kg)                        | $1.01 \pm 0.29$  |
| $V_{\text{ss}}$ (L/kg)                | $2.17 \pm 0.40$  |

### Supplementary Figure 2 Serum stability, proteolytic stability and pharmacokinetic analysis of SLAP-S25.

(a) SLAP-S25 retained its antibacterial activity and synergy effect with colistin against *E. coli* B2 in the presence of either 50% fetal bovine serum or 50% rabbit serum. (b) Proteolytic stability of SLAP-S25 on the antibacterial activity of *E. coli* B2 (MIC,  $\mu\text{g/mL}$ ). (c) Mean plasma concentrations of SLAP-S25 after a single intraperitoneal injection of 8 mg/kg SLAP-S25 during 48 h. All data were presented as means  $\pm$  SD ( $n = 6$ ). (d) Pharmacokinetic parameters of SLAP-S25 calculated with a non-compartmental analysis model based on WinNonlin 6.4 ( $n = 6$ ).  $C_{\text{max}}$ , maximal plasma concentration;  $T_{\text{max}}$ : time to maximal plasma concentration;  $t_{1/2}$ , half-life; AUC, area under the concentration curve; CL, total plasma clearance;  $V_{\text{ss}}$ , volume of distribution.

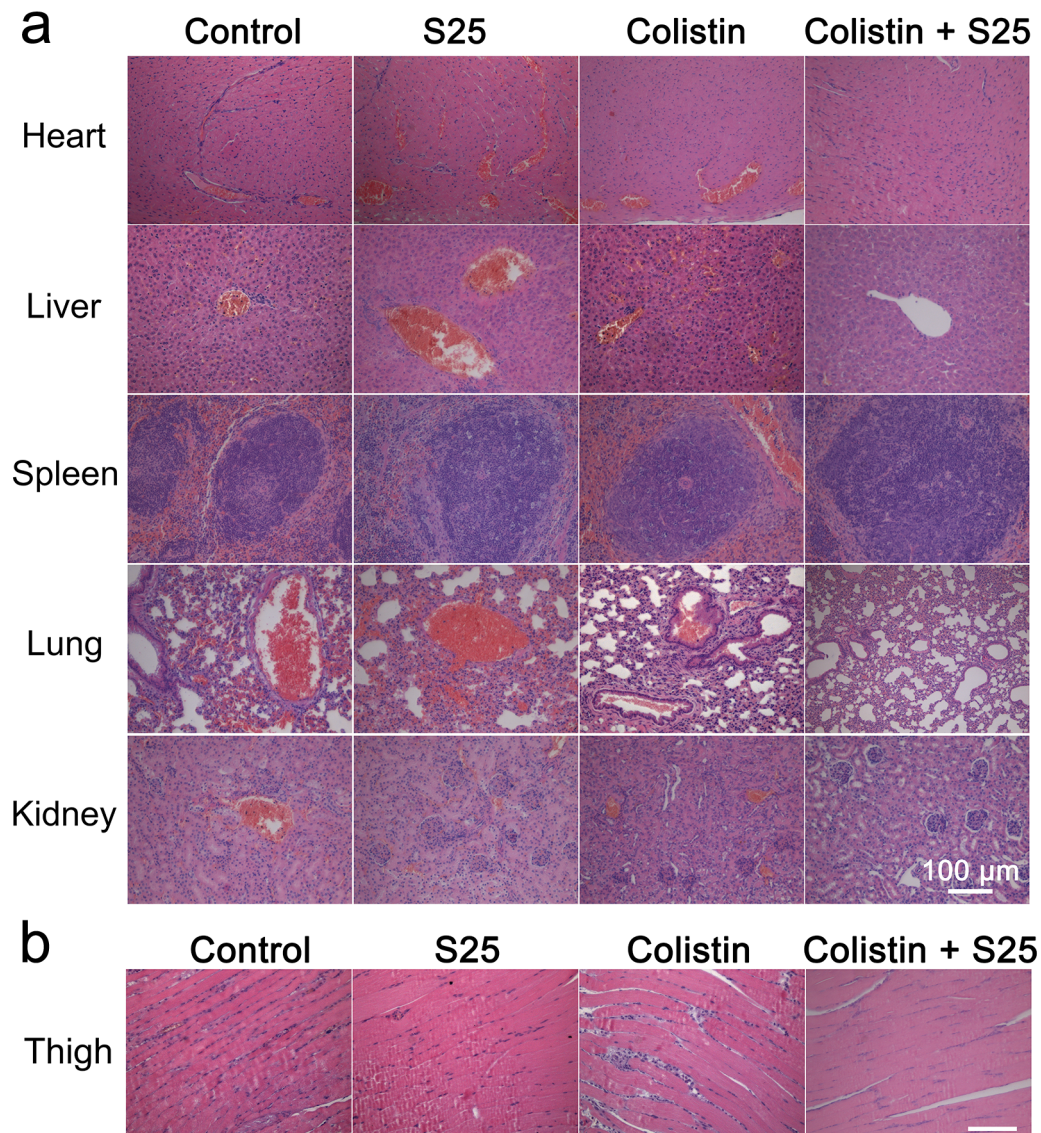

**Supplementary Figure 3 Histologic analysis of the tissues in two mice infection models using hematoxylin-eosin (H&E) staining.**

Histopathological changes of different organs (**a**) in the mouse peritonitis-sepsis model and of muscles (**b**) in the thigh infection model treated with PBS (control), SLAP-S25 (8 mg/kg), colistin (8 mg/kg) or combination used (8 mg/kg + 8 mg/kg). Magnification,  $\times 400$ . The results were representative of three biological repeats.

## References

1. Liu, Y., Ding, S., Dietrich, R., Märtlbauer, E. & Zhu, K. A biosurfactant-inspired heptapeptide with improved specificity to kill MRSA. *Angew. Chem. Int. Ed.* **56**, 1486-1490 (2017).
2. Ling Z. *et al.* Chromosome-mediated *mcr-3* variants in *Aeromonas veronii* from chicken meat. *Antimicrob. Agents. Chemother.* **61**, e01272-01217 (2017).
3. Li H., *et al.* Molecular insights into functional differences between *mcr-3*- and *mcr-1*-mediated colistin resistance. *Antimicrob. Agents. Chemother.* **62**, e00366-18 (2018).
