# Supplementary material for: A broad-spectrum antibiotic adjuvant reverses multidrug-resistant Gram-negative pathogens
Source: Springer Nature journal article supplement (doi:10.1038/s41564-020-0723-z), 2020-05-18
Supplement: 41564_2020_723_MOESM2_ESM.pdf [file 41564_2020_723_MOESM2_ESM.pdf]

## Reporting Summary

Nature Research wishes to improve the reproducibility of the work that we publish. This form provides structure for consistency and transparency in reporting. For further information on Nature Research policies, see [Authors & Referees](#) and the [Editorial Policy Checklist](#).

### Statistics

For all statistical analyses, confirm that the following items are present in the figure legend, table legend, main text, or Methods section.

n/a Confirmed

- |                                     |                                     |                                                                                                                                                                                                                                                            |
|-------------------------------------|-------------------------------------|------------------------------------------------------------------------------------------------------------------------------------------------------------------------------------------------------------------------------------------------------------|
| <input type="checkbox"/>            | <input checked="" type="checkbox"/> | The exact sample size ( $n$ ) for each experimental group/condition, given as a discrete number and unit of measurement                                                                                                                                    |
| <input type="checkbox"/>            | <input checked="" type="checkbox"/> | A statement on whether measurements were taken from distinct samples or whether the same sample was measured repeatedly                                                                                                                                    |
| <input type="checkbox"/>            | <input checked="" type="checkbox"/> | The statistical test(s) used AND whether they are one- or two-sided<br><i>Only common tests should be described solely by name; describe more complex techniques in the Methods section.</i>                                                               |
| <input type="checkbox"/>            | <input checked="" type="checkbox"/> | A description of all covariates tested                                                                                                                                                                                                                     |
| <input type="checkbox"/>            | <input checked="" type="checkbox"/> | A description of any assumptions or corrections, such as tests of normality and adjustment for multiple comparisons                                                                                                                                        |
| <input type="checkbox"/>            | <input checked="" type="checkbox"/> | A full description of the statistical parameters including central tendency (e.g. means) or other basic estimates (e.g. regression coefficient) AND variation (e.g. standard deviation) or associated estimates of uncertainty (e.g. confidence intervals) |
| <input checked="" type="checkbox"/> | <input type="checkbox"/>            | For null hypothesis testing, the test statistic (e.g. $F$ , $t$ , $r$ ) with confidence intervals, effect sizes, degrees of freedom and $P$ value noted<br><i>Give <math>P</math> values as exact values whenever suitable.</i>                            |
| <input checked="" type="checkbox"/> | <input type="checkbox"/>            | For Bayesian analysis, information on the choice of priors and Markov chain Monte Carlo settings                                                                                                                                                           |
| <input checked="" type="checkbox"/> | <input type="checkbox"/>            | For hierarchical and complex designs, identification of the appropriate level for tests and full reporting of outcomes                                                                                                                                     |
| <input checked="" type="checkbox"/> | <input type="checkbox"/>            | Estimates of effect sizes (e.g. Cohen's $d$ , Pearson's $r$ ), indicating how they were calculated                                                                                                                                                         |

*Our web collection on [statistics for biologists](#) contains articles on many of the points above.*

### Software and code

Policy information about [availability of computer code](#)

Data collection

The OD600nm values, luminescence and fluorescence intensity were collected by Tecan Infinite M200 Microplate reader; Fluorescent images of stained bacteria were obtained by Leica TCS SP8 confocal laser scanning microscope; The Ct values of RT-PCR were collected using ABI quantstudio™ 7 detection system.

Data analysis

GraphPad Prism 7 was used to plot graphs; Statistical analysis was performed by GraphPad Prism 5 and SPSS. pharmacokinetic parameters were obtained using a non-compartmental analysis model by WinNonlin 6.4; R v3.5.1 and Heatmap package were used to analyze the transcriptome data.

For manuscripts utilizing custom algorithms or software that are central to the research but not yet described in published literature, software must be made available to editors/reviewers. We strongly encourage code deposition in a community repository (e.g. GitHub). See the Nature Research [guidelines for submitting code & software](#) for further information.

### Data

Policy information about [availability of data](#)

All manuscripts must include a [data availability statement](#). This statement should provide the following information, where applicable:

- Accession codes, unique identifiers, or web links for publicly available datasets
- A list of figures that have associated raw data
- A description of any restrictions on data availability

Source data supporting the findings of this study are included in the article. RNA-seq data have been deposited in NCBI SRA with accession number PRJNA610702.

## Field-specific reporting

Please select the one below that is the best fit for your research. If you are not sure, read the appropriate sections before making your selection.

Life sciences       Behavioural & social sciences       Ecological, evolutionary & environmental sciences

For a reference copy of the document with all sections, see [nature.com/documents/nr-reporting-summary-flat.pdf](https://www.nature.com/documents/nr-reporting-summary-flat.pdf)

## Life sciences study design

All studies must disclose on these points even when the disclosure is negative.

|                 |                                                                                                                                                                                                                            |
|-----------------|----------------------------------------------------------------------------------------------------------------------------------------------------------------------------------------------------------------------------|
| Sample size     | All experiments were performed with at least two independent biological replicates. Each value shown in figures was presented as the mean value of the biological replicates, with standard deviation shown as error bars. |
| Data exclusions | For differential expression analysis, the RNA expression levels for each gene with fragments per kilobase per million reads mapped (FPKM) lower than 1 were removed from consideration before downstream analysis.         |
| Replication     | All of the reported results were reproducible.                                                                                                                                                                             |
| Randomization   | For animal studies, six to eight-week-old female BALB/c mice and larvae of <i>Galleria mellonella</i> were randomly assigned to the experimental and the control groups by the experimenter.                               |
| Blinding        | No blinding was required because all measurements are not subject to investigator's bias or ambiguity.                                                                                                                     |

## Reporting for specific materials, systems and methods

We require information from authors about some types of materials, experimental systems and methods used in many studies. Here, indicate whether each material, system or method listed is relevant to your study. If you are not sure if a list item applies to your research, read the appropriate section before selecting a response.

### Materials & experimental systems

| n/a                                 | Involvement in the study                                        |
|-------------------------------------|-----------------------------------------------------------------|
| <input checked="" type="checkbox"/> | <input type="checkbox"/> Antibodies                             |
| <input type="checkbox"/>            | <input checked="" type="checkbox"/> Eukaryotic cell lines       |
| <input checked="" type="checkbox"/> | <input type="checkbox"/> Palaeontology                          |
| <input type="checkbox"/>            | <input checked="" type="checkbox"/> Animals and other organisms |
| <input checked="" type="checkbox"/> | <input type="checkbox"/> Human research participants            |
| <input checked="" type="checkbox"/> | <input type="checkbox"/> Clinical data                          |

### Methods

| n/a                                 | Involvement in the study                        |
|-------------------------------------|-------------------------------------------------|
| <input checked="" type="checkbox"/> | <input type="checkbox"/> ChIP-seq               |
| <input checked="" type="checkbox"/> | <input type="checkbox"/> Flow cytometry         |
| <input checked="" type="checkbox"/> | <input type="checkbox"/> MRI-based neuroimaging |

## Eukaryotic cell lines

Policy information about [cell lines](#)

|                                                                      |                                                                       |
|----------------------------------------------------------------------|-----------------------------------------------------------------------|
| Cell line source(s)                                                  | All eukaryotic cell lines used in this paper were obtained from ATCC. |
| Authentication                                                       | None of the cell lines were authenticated.                            |
| Mycoplasma contamination                                             | The cell lines were not tested for mycoplasma contamination.          |
| Commonly misidentified lines<br>(See <a href="#">ICLAC</a> register) | No commonly misidentified species used.                               |

## Animals and other organisms

Policy information about [studies involving animals](#); [ARRIVE guidelines](#) recommended for reporting animal research

|                         |                                          |
|-------------------------|------------------------------------------|
| Laboratory animals      | Six to eight-week-old female BALB/c mice |
| Wild animals            | None                                     |
| Field-collected samples | None                                     |

## Ethics oversight

The laboratory animal usage license number is SYXK-2016-0008, certified by Beijing Association for Science and Technology and the animal study protocols were performed in accordance with the relevant guidelines and regulations (ID: SKLAB-B-2010-003).

Note that full information on the approval of the study protocol must also be provided in the manuscript.
